1 **Focused screening reveals functional effects of microRNAs differentially**  
2 **expressed in colorectal cancer**

3

4 Danuta Sastre, PhD <sup>1,2</sup>

5 João Baiochi, BSc <sup>2</sup>

6 Ildercilio Mota de Souza Lima, PhD <sup>2</sup>

7 Josiane Lilian dos Santos Schiavinato, PhD <sup>2</sup>

8 Dimas Tadeu Covas, PhD <sup>2</sup>

9 Rodrigo Alexandre Panepucci, PhD <sup>2\*</sup> – [rapane@gmail.com](mailto:rapane@gmail.com)

10

11 <sup>1</sup> Department of Pathology, Stanford University

12 300 Pasteur Dr. Palo Alto, CA 94304. USA.

13 <sup>2</sup> Laboratory of Functional Biology (LFBio), Center for Cell-Based Therapy (CTC), Blood

14 Center of Ribeirão Preto

15 R. Ten. Catão Roxo, 2501. Ribeirão Preto, SP 14051-140. Brazil

16

17 \*Correspondence:

18 [rapane@gmail.com](mailto:rapane@gmail.com)

19 Rodrigo Alexandre Panepucci, PhD.

20 Laboratory of Functional Biology (LFBio), Center for Cell-Based Therapy (CTC), Blood

21 Center of Ribeirão Preto

22 R. Ten. Catão Roxo, 2501. Ribeirão Preto, SP 14051-140. Brazil

23

24

Sastre *et al.* Focused screening reveals functional effects of microRNAs differentially expressed in colorectal cancer.

25 **Abstract**

26

27 **Background:** Colorectal cancer (CRC) is still a leading cause of death worldwide.

28 Recent studies have pointed to an important role of microRNAs carcinogenesis. In fact,  
29 several microRNAs have been described as aberrantly expressed in CRC tissues and in  
30 the serum of patients. More specifically, microRNAs with dual roles in both cancer and  
31 stem cell survival represent a potential source of novel molecular targets in CRC due to  
32 their described functions in normal and deregulated proliferation. However, the  
33 functional outcomes of microRNA aberrant expression still need to be explored at the  
34 cellular level. Here, we aimed to investigate the effects of microRNAs involved in the  
35 control of pluripotency of stem cells in the proliferation and cell death of a colorectal  
36 cancer cell line.

37 **Methods:** We performed transfection of 31 microRNA mimics in HCT116 CRC cells.

38 Cell proliferation and cell death were measured after 4 days of treatment using  
39 fluorescence staining in a high content screening platform. Total number of live and  
40 dead cells were automatically counted and analyzed. To reveal mRNA targets, we used  
41 an oligonucleotide microarray. Functional classification of targets was done using  
42 DAVID tool. Gene expression of potential mRNA targets was performed by qPCR.

43 **Results:** Twenty microRNAs altered the proliferation of HCT116 cells in comparison to  
44 control. Three microRNAs significantly repressed cell proliferation and induced cell  
45 death simultaneously (miR-22-3p, miR-24-3p, and miR-101-3p). Interestingly, all anti-  
46 proliferative microRNAs in our study had been previously described as poorly  
47 expressed in the CRC samples and were implicated in the disease. Microarray analysis

Sastre *et al.* Focused screening reveals functional effects of microRNAs differentially expressed in colorectal cancer.

48 of miR-101-3p targets revealed Wnt and cancer as pathways regulated by this  
49 microRNA. Specific repression of anti-apoptotic isoform of MCL-1, a member of the  
50 BCL-2 family, was also identified as a possible mechanism for miR-101-3p anti-  
51 proliferative/pro-apoptotic effect.

52 **Conclusions:** microRNAs described as upregulated in CRC tend to induce proliferation  
53 in vitro, whereas microRNAs described as poorly expressed in CRC halt proliferation  
54 and induce cell death in vitro. Selective inhibition of anti-apoptotic MCL-1 contributes to  
55 anti-tumoral activity of miR-101-3p.

56

57

58 **Keywords:**

59 Colorectal Cancer, microRNAs, miR-101-3p, proliferation, cell death, MCL-1, miR-22-  
60 3p, miR-24-3p, pluripotency

61

62

63 **Background**

64

65 Colorectal cancer (CRC) is still the third most common cancer worldwide [1] despite  
66 recent advancements in screening and treatment. It is estimated that over 140,000 new  
67 cases of colon and rectal cancers were diagnosed in 2018 in the United States alone  
68 [2]. MicroRNAs (miRNAs) are small nucleic acids involved in the post-transcriptional  
69 regulation of gene expression, and have been implicated in the pathogenesis and

Sastre *et al.* Focused screening reveals functional effects of microRNAs differentially expressed in colorectal cancer.

70 prognosis of CRC [3-5].  
71 miRNAs are usually encoded in the human genome as clusters. After nuclear  
72 processing, these molecules are exported to the cytoplasm and loaded into RNA-  
73 induced silencing complexes (RISC), directing them against binding sites in the 3'-UTR  
74 region of target mRNAs, based on the degree of complementarity. While a perfect  
75 match leads to mRNA cleavage, miRNAs with partial complementarity lead to  
76 translation blockade and/or mRNA degradation through multiple mechanisms [6]. In  
77 either case, miRNAs predominantly act to decrease target mRNA levels [7]. Since a  
78 miRNA:mRNA perfect match is not required for miRNA silencing of its targets, one  
79 miRNA can affect the expression of hundreds of target transcripts. Hence, deregulation  
80 of a single miRNA can lead to global alterations in gene expression in a given cell [8].  
81 Aberrant expression of miRNAs contributes to tumorigenesis mainly by two  
82 mechanisms: repression of tumor suppressor genes or loss of repression of oncogenes  
83 [9]. In the first case, miRNAs become overexpressed and downregulate the expression  
84 of tumor suppressor genes; in the latter case, miRNAs become downregulated  
85 themselves while their oncogene targets are overexpressed due to reduced post-  
86 transcriptional silencing. This abnormal miRNA profile can facilitate proliferation and  
87 survival of tumor cells in malignancies such as CRC [10].  
88 miRNAs controlling pluripotency of embryonic stem cells have been associated with  
89 tumorigenesis in diverse cancers, including CRC [11-13]. In fact, cancer cells and  
90 pluripotent stem cells share the ability to proliferate rapidly and virtually indefinitely [14].  
91 Strikingly, reprogramming of somatic cells into induced pluripotent stem cells share many

Sastre *et al.* Focused screening reveals functional effects of microRNAs differentially expressed in colorectal cancer.

92 similarities with the process of malignant transformation [15]. Therefore, miRNAs  
93 controlling stemness and differentiation of stem cells have potential to be used as  
94 targets for the study of uncontrolled proliferation in cancer. However, this has not yet  
95 been tested in the context of CRC, and functional data on the effects of these miRNAs  
96 in the survival of CRC cells is still lacking.

97 We hypothesized that miRNAs involved in the control of pluripotency and differentiation  
98 of stem cells can alter the proliferation and survival of CRC cells. With that in mind, we  
99 have selected a panel of 31 miRNAs that have their expression modulated during the  
100 differentiation of embryonic stem cells [16]. We then set out to identify the effects of  
101 these miRNAs on the proliferation and cell death in a human cellular model of CRC.  
102 Importantly, most of the miRNAs in this panel have been described to be differentially  
103 expressed in CRC (**Table 1**). Here, we identified three miRNAs that suppressed  
104 proliferation of CRC cells while also inducing significant cell death. Microarray analysis  
105 of miR-101-3p targets revealed modulation of relevant cancer-related pathways. We  
106 also provide further evidence that loss of miR-101-3p expression in colorectal cancer  
107 can confer proliferative advantage to malignant cells.

108

## 109 **Methods**

110

### 111 **Cell culture and miRNA transfection**

112 Human CRC cell line HCT116 (ATCC® CCL-247™) was cultivated using DMEM high-  
113 glucose supplemented with 10% FBS. Medium was changed every two days and cells

Sastre *et al.* Focused screening reveals functional effects of microRNAs differentially expressed in colorectal cancer.

114 were passaged by enzymatic treatment with TrypLE (ThermoFisher, Cat. No.  
115 12604021) when 90-100% confluent. Cells were subcultured at 1:6 ratio into new  
116 flasks.  
117 Synthetic miRNA mimics (pre-miRs) and an unspecific control (pre-miR control) were  
118 individually transfected into HCT116 cells by reverse transfection (**Supplementary**  
119 **Table 1**). In summary, 50uL of culture medium containing  $8 \times 10^3$  cells was added to  
120 wells of 96-well plates pre-filled with a mixture composed of 0.15 uL Lipofectamine  
121 RNAiMax (ThermoFisher, Cat. No. 13778150) and miRNAs in 50uL serum-free culture  
122 medium (50nM final miRNA concentration). Medium was changed 24h post-  
123 transfection, and cells were kept in culture for 4 additional days for proliferation assay.  
124 For gene expression analysis,  $8 \times 10^4$  cells were seeded in 6-well plates 18-24h before  
125 miRNA transfection. Transfection protocol was adjusted for a final volume of 1 mL. Cells  
126 were collected 72 h post-transfection for RNA extraction, used for qPCR and microarray  
127 analyses.

#### 128 **Proliferation/Cell Death Assay**

129 For proliferation assay, medium was removed after 4 days in culture and replaced by a  
130 1.25 ug/mL solution of membrane-impermeant Propidium Iodide (PI) and 1uM of the  
131 membrane-permeant Hoechst 33342 (Hoechst) DNA stains, in final volume of 100  $\mu$ L  
132 PBS. After an incubation period of 10 min, images were acquired by automated  
133 fluorescence microscopy using a High Content Screening platform (ImageXpress;  
134 Molecular Devices Inc.), under 10X objective. Excitation and emission channels used  
135 were 377/447 nm and 531/593 nm for PI and Hoechst, respectively. Nuclei of live cells

Sastre *et al.* Focused screening reveals functional effects of microRNAs differentially expressed in colorectal cancer.

136 (i.e. with intact membranes) were stained only by Hoechst, whereas nuclei of dead cells  
137 were stained by PI as well. Acquisition and analysis of images were performed using  
138 the platform's built-in software MetaXpress, using the Live/Dead Application Module.  
139 For each well of a 96-well plate, nine fields were acquired and all cells within this area  
140 were quantified. ANOVA test with Dunnett post-test was used to detect differences  
141 between cells in wells transfected with control and miRNA mimics, in terms of total  
142 number of Hoechst-positive cells (proliferation) and percentage of PI-positive cells  
143 (death).

#### 144 **RNA extraction and RT-qPCR**

145 Total RNA was extracted from cells 72 h post-transfection using Trizol reagent  
146 (ThermoFisher, Cat. No. 15596018), following manufacturer's instructions. cDNA was  
147 generated by reverse transcription using 1 ug of RNA as starting material, using the  
148 High Capacity cDNA Reverse Transcription kit (ThermoFisher, Cat. No. 4368814),  
149 following manufacturer's instructions. Real-time qPCR reactions were performed using  
150 SYBR Green PCR master mix (ThermoFisher, Cat. No. 4309155) and in-house primers  
151 **(Supplementary Table 2)** using 10ng of cDNA. Relative gene expression was  
152 calculated using the  $2^{-\Delta\Delta CT}$  method. *GAPDH* was the normalizer housekeeping gene and  
153 Control was used as reference sample. All experiments were performed in 3 biological  
154 replicates. t-test was used to detect differences between treatments and control.

#### 155 **Oligonucleotide Microarray and Bioinformatics Analyses**

156 Whole Human Genome Microarray Kit 4x44K (Agilent, Cat. No. G4112F) was used to  
157 detect mRNA expression levels in cells transfected with control and miR-101-3p

Sastre *et al.* Focused screening reveals functional effects of microRNAs differentially expressed in colorectal cancer.

158 transfected HCT116 cells, following manufacturer's instructions. Differential expression  
159 of 41,000+ unique transcripts was analyzed using bioinformatics package Bioconductor  
160 (Gentleman, Carey et al. 2004). Results were normalized using LIMMA package [17].  
161 Transcripts were considered differentially expressed when fold change was higher than  
162 0.5 and  $p < 0.05$ , using moderate T test. False Discovery Rate (FDR) test was used to  
163 adjust p values.  
164 Predicted targets of miR-101-3p were obtained from the TargetScan database [18]. In  
165 order to carry a pathway enrichment analysis, we used the whole set of predicted  
166 targets that were also downregulated by miR-101-3p in our microarray analysis. This set  
167 of transcripts were analyzed using the Database for Annotation, Visualization and  
168 Integrated Discovery (DAVID) [19], restricting the analysis to pathway data from the  
169 Kyoto Encyclopedia of Genes and Genomes (KEGG) [20].

170

## 171 **Results**

172

### 173 **microRNAs induce or halt proliferation of colorectal cancer cells**

174 Several miRNAs have been reported to be differentially expressed in CRC tissue when  
175 compared to normal adjacent tissues, or between the serum of CRC patients and  
176 healthy controls. However, discrepant results are often found by different authors for  
177 several microRNAs (**Table 1**). Additionally, the functional outcomes of up- and  
178 downregulation of specific miRNAs in colorectal cancer cells remain to be fully  
179 evaluated.



Sastre *et al.* Focused screening reveals functional effects of microRNAs differentially expressed in colorectal cancer.

180 To investigate the effects of miRNAs on the proliferation and survival of CRC cells, we  
181 performed a focused screen in HCT116 cell line. Cells were transfected with 31  
182 synthetic miRNA duplexes mimics and cultured for 4 days. These so called pre-miR  
183 molecules are small, double-stranded RNA molecules designed to mimic endogenous  
184 mature miRNAs. Chemical modifications induce loading of the correct strand into RISC  
185 (**Supplementary Table 1**). Upon delivery via lipofection, one strand of the pre-miR  
186 molecule is loaded into RISC complexes, where it can modulate expression of target  
187 mRNAs, mimicking the effects of native miRNAs. Total number of live and dead cells  
188 was determined by fluorescence staining of transfected cells and imaging using a High  
189 content screening (HCS) platform. Image analysis of transfected cells allowed us to  
190 simultaneously identify miRNAs affecting cell proliferation and/or death of CRC cells  
191 (**Figure 1; Additional File 1**).

192

193 **TABLE 1 HERE**

194

195 Four days following transfection of miRNAs mimics on HCT116 cells, 16 of the miRNAs  
196 induced proliferation significantly (i.e. higher total cell counts, as compared to control),  
197 while only 4 repressed it. On the other hand, 8 miRNAs reduced cell death (i.e. lower  
198 percentage of dead cells, as compared to control), while 6 induced it.

199 Eight miRNAs described as upregulated in CRC tissues or serum samples induced  
200 significant increase in cell proliferation (miR-21-5p, -23a-3p, -27a-3p, -92a-3p, -181d-5p,  
201 -222-3p, -372-3p, and -373-3p), whereas only one CRC-upregulated miRNA inhibited

Sastre *et al.* Focused screening reveals functional effects of microRNAs differentially expressed in colorectal cancer.

202 proliferation (miR-24-3p). Cancer and pluripotency related miRNAs belonging to clusters  
203 miR-106a~363, miR-17~92 and miR-302 induced significant increase in proliferation.  
204 Notably, mimics of miR-22-3p, miR-24-3p, and miR-101-3p, all described as CRC-  
205 downregulated miRNAs, simultaneously reduced cell proliferation and induced cell  
206 death, significantly, when compared to control. We decided to focus on miR-101-3p for  
207 further experiments due to described involvement of this miRNA in CRC.

208

209 **Figure 1: miRNAs differentially expressed in CRC modulate the proliferation of**  
210 **HCT116 cells.**

211 HCT116 were treated with 50nM of miRNA mimics for 4 days in 96-well plates. Total  
212 number of cells and number of dead cells were quantified by high-content screening  
213 analysis. Data is expressed as mean  $\pm$  SD. Gray symbols indicate no significant  
214 differences.

215

216 **miR-101 downregulates signaling pathways controlling cell survival**

217 Transfection of miR-101-3p in HCT116 cells led to reduction of cell numbers and  
218 increased cell death (**Figure 2a**). To identify potential post-transcriptional regulatory  
219 mechanisms mediating the observed functional effects of miR-101-3p, we performed a  
220 gene expression analysis using oligonucleotide microarray of HCT116 transfected with  
221 miR-101-3p mimics. A total of 4,826 transcripts were significantly downregulated by  
222 miR-101-3p (**Figure 2b**). In silico predictions of miR-101-3p targets from the  
223 TargetScan database [18] were crossed with our experimental data to identify

Sastre *et al.* Focused screening reveals functional effects of microRNAs differentially expressed in colorectal cancer.

224 transcripts most likely to be directly regulated by miR-101-3p (**Figure 2c**). Twenty  
225 percent (198 out of 947) of miR-101-3p predicted targets were downregulated in  
226 HCT116 treated with miR-101-3p. Moreover, 47 of these targets had also been  
227 experimentally validated by diverse studies cataloged by miRTarBase [21] (**Figure 2d**),  
228 featuring Wnt and apoptosis-related genes. This subset of predicted target transcripts  
229 downregulated upon introduction of miR-101-3p in HCT116 CRC cells, and previously  
230 experimentally validated in independent studies, represent high-confidence targets  
231 (**Additional File 2**).

232  
233 **Figure 2: Differential gene expression in HCT116 treated with miR-101-3p.**

234 a) Representative fields of HCT116 treated with miR-101-3p for 4 days, showing  
235 increase in cell death and decrease of overall proliferation; b) Volcano plot showing  
236 downregulated (red) and upregulated (green) transcripts as a function of fold-change  
237 and P-value after 3 days of treatment; c) Experimentally downregulated targets are  
238 crossed with predicted and validated targets to identify high confidence targets; d)  
239 Functionally validated targets (miRTarBase) that were downregulated by miR-101-3p in  
240 microarray analysis.

241  
242 **Figure 3: Genes downregulated by miR-101-3p in HCT116.**

243 a) Expression of potential direct and indirect targets of miR-101-3p in HCT116 cells  
244 relative to control; b) MCL-1 protein interaction network. Red circles indicate genes  
245 downregulated by miR-101-3p in microarray data. Data is expressed as mean  $\pm$  SD.  
246 N=3. \*  $p < 0.01$ , \*\*  $p < 0.001$ , \*\*\*  $p < 0.0001$

Sastre *et al.* Focused screening reveals functional effects of microRNAs differentially expressed in colorectal cancer.

247

248 In order to extract information regarding cellular processes that could be post-  
249 transcriptionally modulated by miR-101-3p, we performed a pathway enrichment  
250 analysis using Database for Annotation, Visualization and Integrated Discovery (DAVID)  
251 [19] by entering the set of predicted miR-101-3p targets that were downregulated in our  
252 microarray (198 transcripts). Perhaps not surprisingly, “Pathways in Cancer” and “Wnt”  
253 had the highest enrichment of targets associated with miR-101-3p expression. Kyoto  
254 Encyclopedia of Genes and Genomes (KEGG) (Kanehisa and Goto 2000, Kanehisa,  
255 Furumichi et al. 2017) pathway data was used to organize genes lists according to  
256 function. (**Table 2**).

257

258 **TABLE 2 HERE**

259

260 Next, we analyzed the expression of several putative miR-101-3p direct and indirect  
261 targets in HCT116 cells (**Figure 3a**). First, we analyzed the expression of several  
262 oncogenes and cell cycle related transcripts. Levels of tumor suppressors Phosphatase  
263 and Tensin Homolog (*PTEN*) and Cyclin Dependent Kinase Inhibitor 1C (*CDKN1C*) did  
264 not differ significantly from control treated cells. However, miR-101-3p expression  
265 inhibited v-myc myelocytomatosis viral oncogene homolog (*MYC*) mRNA, which can  
266 help explain, at least partially, the observed halt in cell proliferation of transfected  
267 HCT116 cells. Similarly, we observed repression of Enhancer of Zeste 2 Polycomb  
268 Repressive Complex 2 Subunit (*EZH2*), which is a predicted target of miR-101-3p that

Sastre *et al.* Focused screening reveals functional effects of microRNAs differentially expressed in colorectal cancer.

269 has been linked to oncogenesis in CRC [22, 23]. Analysis of canonical Wnt pathway  
270 genes revealed upregulation of  $\beta$ -catenin mRNA (*CTNNB1*) whereas Glycogen Synthase  
271 Kinase 3 Beta (*GSK3B*) and Adenomatous Polyposis Coli (*APC*) remained unaltered, in  
272 spite of both *GSK3B* and *APC* being predicted targets of miR-101-3p.

273 We found that Myeloid cell leukemia-1 (*MCL1*), a member of the BCL-2 family of tumor  
274 suppressors and a predicted target of miR-101-3p, was downregulated in our  
275 microarray data. *MCL1* gene encoded three isoforms: one long, anti-apoptotic MCL-1L,  
276 and two shorter pro-apoptotic MCL-1S and MCL-1ES [24]. Downregulation of *MCL1*  
277 mRNA observed in the microarray was confirmed by qPCR. Interestingly, only the anti-  
278 apoptotic isoform of MCL-1 was downregulated by miR-101-3p (**MCL-1L, Figure 3a**).

279 Additional apoptosis-related genes that closely interact with MCL-1 were also  
280 downregulated by miR-101-3p in our microarray data (**Figure 3b**).

281

## 282 **Discussion**

283

284 In the present study, we evaluated the effects of 31 miRNAs on the proliferation and  
285 survival of a colorectal cancer cell line. Twenty miRNA mimics significantly altered  
286 HCT116 total cell numbers compared to control. Mimics of miR-22-3p, miR-24-3p, and  
287 miR-101-3p significantly reduced cell proliferation whilst inducing significant cell death  
288 when compared to control.

289 Differential expression of miRNAs is a common feature of many malignancies.

290 Upregulation of oncomiRs and, conversely, downregulation of tumor suppressor

Sastre *et al.* Focused screening reveals functional effects of microRNAs differentially expressed in colorectal cancer.

291 miRNAs is believed to play a role in the proliferation and survival of cancer cells [9, 25].  
292 Perhaps not surprisingly, around 30-50% of miRNAs are located at instable, cancer-  
293 associated genomic regions, and fragile sites [26, 27], which contributes to their  
294 aberrant expression profiles. miRNAs controlling pluripotency and differentiation of stem  
295 cells have been shown to be involved in tumorigenic processes and cancer stem cell  
296 derivation [28].  
297 The panel of miRNAs tested in the present study represent miRNAs downregulated or  
298 upregulated during the differentiation of embryonic stem cells [16]. It is hypothesized  
299 that during the differentiation process downregulated miRNAs are involved in the  
300 maintenance of stemness properties, whereas miRNAs upregulated are involved in the  
301 induction of differentiation. More importantly, the miRNAs tested also represent the  
302 most frequently reported as differentially expressed miRNAs in CRC (**Table 1**).  
303 Zhu and colleagues identified 38 miRNAs differentially expressed in tumor tissues of  
304 CRC patients [29]. Among the 30 miRNAs found upregulated in that study, miR-21-5p,  
305 miR-20b-5p, miR-106a-5p, miR-92a-3p and miR-17-3p were also included in our study  
306 and, except for miR-18b, they all stimulated cell proliferation of HCT116 cells in our  
307 screening, albeit only significantly for miR-21-5p and miR-92-3p. On the other hand,  
308 miRNAs that significantly reduced cell proliferation and induced cell death in our study  
309 had previously been described as poorly expressed in CRC samples: miR-22-3p [30],  
310 miR-24-3p [31], and miR-101-3p [32]. Ng *et al.* also detected differential expression of  
311 several miRNAs tested in our screening [33]. Among the concordantly upregulated  
312 miRNAs in serum and CRC biopsies in that study, miR-92-3p and miR-222-3p were

Sastre *et al.* Focused screening reveals functional effects of microRNAs differentially expressed in colorectal cancer.

313 also tested in our screening and induced significant increase in proliferation of HCT116  
314 cells.

315 miRNAs can be expressed from polycistronic clusters wherein several miRNAs stem  
316 from the same primary transcript [34]. In this study, we investigated miRNAs belonging  
317 to cluster miR-17~92 (miR-17-3p, -18a-5p, -19a-3p, -19b-3p, -20a-5p, -92a-3p), cluster  
318 miR-106a~363 (miR-18b-5p, -20b-5p, -106a-5p, -363-3p) and cluster miR-302 (miR-  
319 302a-3p, -302a-5p, -302b-3p, -302b-5p, -302c-3p, -302d-3p) . These clusters are  
320 abundantly expressed in pluripotent stem cells and are involved in stemness  
321 maintenance [35] while also being associated with deregulated proliferation and  
322 malignancies [36, 37]. Overall, the cluster miR-17~92 induced proliferation in our  
323 screening. This cluster is located at chromosome 13q31, one of the regions associated  
324 with CRC progression. Previous work has demonstrated that gain of the region  
325 containing this cluster leads to increased expression of the corresponding miRNAs in  
326 CRC tumor samples [37]. Taken together, the proliferation profile observed in our study  
327 points to a proliferative advantage for augmented expression of cluster miR-17~92 in  
328 CRC.

329 The pluripotency-associated cluster miR-302 induced marked proliferation of HCT116  
330 cells in our study. Overexpression of this cluster is sufficient to reprogram somatic cells  
331 to pluripotency [38]. However, it has been suggested that although these miRNAs  
332 activate a pluripotency program in the target cells, they do so while also protecting cells  
333 from malignant transformation [39]. Previous work corroborating this idea has  
334 suggested that overexpression of miR-302 cluster actually can rescue malignant cells

Sastre *et al.* Focused screening reveals functional effects of microRNAs differentially expressed in colorectal cancer.

335 by reducing their proliferative profile and invasiveness [40]. A contrasting study  
336 indicates that overexpression of miR-302 cluster in cancer cells actually leads to a more  
337 invasive and undifferentiated cancer state [28]. Although our data supports the latter  
338 hypothesis, more studies in CRC models will be needed to address the context-  
339 dependent functions of miR-302 cluster in this malignancy.

340 miR-101-3p is one of the miRNAs downregulated during the differentiation of embryonic  
341 stem cells [16]. It markedly reduced cell proliferation and promoted cell death in our  
342 screening. Similar to our results, Chen and colleagues also demonstrated that  
343 overexpression of miR-101-3p in CRC in vitro models (HT-29 and RKO colon cancer  
344 cell lines) reduced proliferation and viability and simultaneously sensitized cells to 5-FU  
345 inhibition [41]. In fact, re-expression of miR-101-3p has been associated to in vitro  
346 sensitization of CRC cells to chemotherapy where miR-101-3p overexpression led to  
347 enhanced activity of paclitaxel and doxorubicin in HT-29 cells [42].

348 miR-101-3p has been found to act as a tumor suppressor in several malignancies, such  
349 as liver [43], glioblastoma [44], breast [45], endometrial [46], and colorectal [47].

350 Downregulation of this miRNA is so frequently found in solid tumors that some authors  
351 propose to use miR-101-3p expression as prognostic biomarker and therapeutic target  
352 [48-51]. miR-101-3p expression is commonly found downregulated in comparison to  
353 healthy adjacent tissues and, in some instances, its expression can predict poor  
354 prognosis and overall survival in CRC [32, 41, 52].

355 Epigenetic factors play an important role in CRC pathogenesis and progression [53].  
356 Here we have shown that miR-101-3p significantly repressed expression of EZH2, a



Sastre *et al.* Focused screening reveals functional effects of microRNAs differentially expressed in colorectal cancer.

357 member of the Polycomb Repressor Complex 2 (PCR2) which catalyzes methylation of  
358 lysine 27 of histone H3 (H3K27me3). This complex modifies the chromatin structure to  
359 favor a proliferative program by bypassing the Ink4a/Arf-pRb-p53 pathway [54]. EZH2  
360 promotes proliferation of CRC cells, and its silencing by siRNA leads to reduced cancer  
361 cell survival [22]. Recent data has suggested the existence of a negative feedback loop  
362 between EZH2 and miR-101-3p. Treatment of CRC cells with an anti-cancer substance  
363 named methyl jasmonate led to apoptosis and inhibited expression of EZH2 while  
364 upregulated miR-101-3p expression [55]. Furthermore, EZH2 has been linked to  
365 epigenetic inactivation of WNT5A, a proposed tumor suppressor, during TGF- $\beta$ -induced  
366 epithelial-mesenchymal transition in an in vitro model of CRC [56]. EZH2 might also be  
367 involved in CRC chemotherapeutic efficacy. EZH2 repression increased the efficiency of  
368 EGFR inhibitors in vitro [23]. Similarly, Yamamoto and colleagues have shown that  
369 EZH2 expression was associated with survival in CRC patients undergoing anti-EGFR  
370 therapy [57].

371 Hypermethylation has been associated with CRC pathogenesis in several studies [58-  
372 60] [reviewed in [61]]. Aberrant hypermethylation phenotype of tumor suppressor genes  
373 by DNMT3a activity has been reversed by expression of miR-101-3p in a model of lung  
374 cancer, where DNMT3 repression led to promoter hypomethylation and re-expression of  
375 tumor suppressor CDH1 [62]. Perhaps not surprisingly, our microarray data revealed  
376 downregulation of both DNMT3a and DNMT3b in HCT116 cells treated with miR-101-3p  
377 mimics. Similarly, Toyota and colleagues demonstrated that miR-34b and miR-34c were  
378 epigenetically silenced in HCT116 cells, and its expression could be rescued by

Sastre *et al.* Focused screening reveals functional effects of microRNAs differentially expressed in colorectal cancer.

379 treatment with 5-aza-2'-deoxycytidine, a DNA demethylation agent. Moreover, they  
380 showed that CpG methylation of miR-34b/c was a common feature of different CRC  
381 lines [63]. Although authors did not investigate the methylation levels of miR-101-3p  
382 locus, CpG methylation represents a possible mechanism for repression of other  
383 miRNAs in CRC.

384 Our microarray data helps shed light on the involvement of Wnt pathway in CRC.  
385 Inhibition of Wnt pathway results in reduced proliferation in several cancers, including  
386 CRC [64]. We found B-catenin mRNA, the main mediator of canonical Wnt pathway, to  
387 be overexpressed in HCT116 cells in response to miR-101-3p mimics. However,  
388 overexpression of *CTNNB1* as measured by qPCR could reflect the mutated status of  
389 this gene in HCT116 cell line. Mouradov and colleagues performed an extensive whole-  
390 exome sequencing and SNP microarray analysis of 70 CRC cell lines, which revealed  
391 *CTNNB1* mutated status of several of them, including HCT116 [65]. It is interesting to  
392 speculate that miR-101-3p may interfere with the non-canonical Wnt pathway, given  
393 that genes downregulated in our microarray most likely reflect this hypothesis (*CXXC4*,  
394 *CAMK2G*, *FZD4*, *FZD6*, *NLK*, *PLCB1*, *RAC1*). For instance, expression of Nemo-like  
395 kinase (NLK) has been demonstrated to be necessary for cell cycle progression in CRC  
396 in vitro [66].

397 In addition to inhibiting cell proliferation, miR-101-3p also remarkably induced cell death  
398 in treated cells. Several pathways have been implicated in the induction of apoptosis by  
399 miR-101-3p in different cancer cell models [67-69]. Microarray analysis provided some  
400 clues on what genes can be modulated in order to warrant such effect on cell survival.

Sastre *et al.* Focused screening reveals functional effects of microRNAs differentially expressed in colorectal cancer.

401 MCL-1 is a member of the BCL-2 superfamily of apoptosis regulators, and it is one of  
402 the most frequently amplified genes in cancers [70]. MCL-1 gene encodes three  
403 isoforms: the long, anti-apoptotic MCL-1L, and two shorter pro-apoptotic MCL-1S and  
404 MCL-1ES [24]. MCL-1 amplification accounts for resistance to the BCL-2/BCL-xL  
405 inhibitor ABT-737 (Chen et al., 2007, Keuling et al., 2009, van Delft et al., 2006). MCL-1  
406 associates with mitochondrial membrane-associated proteins, Bak and Bax, preventing  
407 them from heterodimerizing with apoptotic members of the BCL-2 family to promote  
408 apoptosis cascade [71]. More strikingly, a recent study has demonstrated that  
409 degradation of MCL-1 is necessary for effective therapeutics against CRC [72].  
410 Similarly, inhibition of MCL-1 by miR-101-3p has been implicated in the apoptosis-  
411 inducing effect of anti-cancer drug doxorubicin in hepatocellular carcinoma [73]. A  
412 similar inhibitory mechanism between miR-101-3p and MCL-1 has been reported for  
413 endometrial cancer as well [46]. The specific inhibition of only the anti-apoptotic MCL-1  
414 isoform in our study highlights a novel mechanism by which miR-101-3p can induce  
415 apoptosis and cell death in our screening, and points to a possible therapeutic target for  
416 oligonucleotide-based therapies.

417 Overall, the cell proliferation profile observed in our model of CRC points to an  
418 interesting tendency: miRNAs overexpressed in CRC augment cell proliferation and,  
419 conversely, miRNAs poorly expressed in CRC reduce cell proliferation and survival.  
420 Additionally, microRNAs characteristic of pluripotent stem cells tend to confer a  
421 proliferative advantage to CRC cells. This phenomenon suggests the existence of  
422 potential functional advantages of the differential expression of miRNAs observed in

Sastre *et al.* Focused screening reveals functional effects of microRNAs differentially expressed in colorectal cancer.

423 colorectal cancer. Since selective pressure within tumor tissue favors accumulation of  
424 genetic alterations that support survival [74], it is tempting to speculate that miRNAs  
425 consistently described as downregulated in CRC could have been selectively repressed  
426 due to their effects on proliferation, such as seen in our study.

427

## 428 **Conclusions**

429

430 Taken together, the results provide additional evidence of functional outcomes resulting  
431 from differential expression of miRNAs in CRC. Additional studies will be necessary to  
432 elucidate the mechanisms by which miRNAs differentially expressed in CRC promote  
433 these effects on proliferation, and the present study points to interesting miRNAs to  
434 pursuit. Additionally, miR-101-3p appears to target multiple transcripts that act  
435 synergistically to promote cell death and halt proliferation of CRC cells in vitro, mainly  
436 by targeting Wnt pathway. More specifically, we provide novel evidence linking inhibition  
437 of MCL-1 by miR-101-3p as a potential mechanism for antitumoral activity of this  
438 miRNA.

439

## 440 **Additional Files**

441 Additional File 1: miRNA screening data and statistical analyses (.xlsx)

442 Additional File 2: Microarray data and statistical analyses (.xlsx)

443

## 444 **List of abbreviations**

Sastre *et al.* Focused screening reveals functional effects of microRNAs differentially expressed in colorectal cancer.

445 5-FU, 5-fluouracil

446 BCL-2, B-cell lymphoma-2

447 CRC, colorectal cancer

448 DAVID, Database for Annotation, Visualization and Integrated Discovery

449 EGFR, epidermal growth factor receptor

450 EZH2, Enhancer of Zeste 2 Polycomb Repressive Complex 2 Subunit

451 KEGG, Kyoto Encyclopedia of Genes and Genomes

452 MCL-1, Myeloid cell leukemia-1

453 NLK, Nemo-like kinase

454 miRNA, microRNAs

455 miR, microRNA

456 RISC, RNA-Induced Silencing Complex

457

458

459 **Declarations**

460

461 **Ethics approval and consent to participate**

462 Not applicable

463 **Consent for publication**

464 Not applicable

465

466 **Availability of data and material**

Sastre *et al.* Focused screening reveals functional effects of microRNAs differentially expressed in colorectal cancer.

467 The datasets used and/or analysed during the current study are available under  
468 Additional Files.

469

#### 470 **Competing interests**

471 Authors declare no conflicts of interest.

472

#### 473 **Funding**

474 This work was supported by the Brazilian National Council for Scientific and  
475 Technological Development, CNPq (Fellowship Process No. 142491/2011-0), and by  
476 the São Paulo Research Foundation, FAPESP/Center for Cell-Based Therapy, CTC  
477 (Grant No. 2013/08135-2).

478

#### 479 **Authors' contributions**

480 DS designed and performed experiments, data analyses and wrote manuscript; JB  
481 performed microarray analyses; IMSL and JLSS performed experiments; DTC provided  
482 study materials; RAP conceptualized screening approaches and supervised  
483 experiments. All authors read and approved final manuscript.

484

#### 485 **Acknowledgements**

486 Authors thank Dr. Joao Farias Guerreiro, MS. Amelia Araujo, Elizabete Audino and  
487 Claudia Magnani for their support in the execution of this project. Authors also thank  
488 Joey Owen and Erika Paulson for revising the final manuscript.

Sastre *et al.* Focused screening reveals functional effects of microRNAs differentially expressed in colorectal cancer.

489

## 490 **References**

- 491 1. International Agency for Research on Cancer. World Health Organization.  
492 Colorectal Cancer Fact Sheet, 2018.  
493 [http://gco.iarc.fr/today/data/factsheets/cancers/10\\_8\\_9-Colorectum-fact-](http://gco.iarc.fr/today/data/factsheets/cancers/10_8_9-Colorectum-fact-sheet.pdf)  
494 [sheet.pdf](http://gco.iarc.fr/today/data/factsheets/cancers/10_8_9-Colorectum-fact-sheet.pdf). Accessed 21 Jan 2019.
- 495 2. Siegel RL, Miller KD, Jemal A: Cancer statistics, 2018. *CA Cancer J Clin.* 2018;  
496 68:7-30.
- 497 3. Guo Y, Bao Y, Yang W: Regulatory miRNAs in Colorectal Carcinogenesis and  
498 Metastasis. *Int J Mol Sci.* 2017; 18.
- 499 4. Zheng Q, Chen C, Guan H, Kang W, Yu C: Prognostic role of microRNAs in  
500 human gastrointestinal cancer: A systematic review and meta-analysis.  
501 *Oncotarget.* 2017; 8:46611-23.
- 502 5. Orang AV, Barzegari A: MicroRNAs in colorectal cancer: from diagnosis to  
503 targeted therapy. *Asian Pac J Cancer Prev.* 2014; 15:6989-99.
- 504 6. Jonas S, Izaurralde E: Towards a molecular understanding of microRNA-  
505 mediated gene silencing. *Nat Rev Genet.* 2015; 16:421-33.
- 506 7. Guo H, Ingolia NT, Weissman JS, Bartel DP: Mammalian microRNAs  
507 predominantly act to decrease target mRNA levels. *Nature.* 2010; 466:835-40.
- 508 8. Subramanyam D, Billelloch R: From microRNAs to targets: pathway discovery in  
509 cell fate transitions. *Curr Opin Genet Dev.* 2011; 21:498-503.
- 510 9. Svoronos AA, Engelman DM, Slack FJ: OncomiR or Tumor Suppressor? The  
511 Duplicity of MicroRNAs in Cancer. *Cancer Res.* 2016; 76:3666-70.
- 512 10. Bonfrate L, Altomare DF, Di Lena M, Travaglio E, Rotelli MT, De Luca A,  
513 Portincasa P: MicroRNA in colorectal cancer: new perspectives for diagnosis,  
514 prognosis and treatment. *J Gastrointest Liver Dis.* 2013; 22:311-20.
- 515 11. Mens MMJ, Ghanbari M: Cell Cycle Regulation of Stem Cells by MicroRNAs.  
516 *Stem Cell Rev.* 2018; 14:309-22.
- 517 12. Caruso S, Bazan V, Rolfo C, Insalaco L, Fanale D, Bronte G, Corsini LR, Rizzo  
518 S, Cicero G, Russo A: MicroRNAs in colorectal cancer stem cells: new regulators  
519 of cancer stemness? *Oncogenesis.* 2012; 1:e32.
- 520 13. Sun X, Liu J, Xu C, Tang SC, Ren H: The insights of Let-7 miRNAs in  
521 oncogenesis and stem cell potency. *J Cell Mol Med.* 2016; 20:1779-88.
- 522 14. Feitelson MA, Arzumanyan A, Kulathinal RJ, Blain SW, Holcombe RF, Mahajna  
523 J, Marino M, Martinez-Chantar ML, Nawroth R, Sanchez-Garcia I *et al*: Sustained  
524 proliferation in cancer: Mechanisms and novel therapeutic targets. *Semin Cancer*  
525 *Biol.* 2015; 35 Suppl:S25-S54.
- 526 15. Iglesias JM, Gumuzio J, Martin AG: Linking Pluripotency Reprogramming and  
527 Cancer. *Stem Cells Transl Med.* 2017; 6:335-9.
- 528 16. Stadler B, Ivanovska I, Mehta K, Song S, Nelson A, Tan Y, Mathieu J, Darby C,  
529 Blau CA, Ware C *et al*: Characterization of microRNAs involved in embryonic  
530 stem cell states. *Stem Cells Dev.* 2010; 19:935-50.

Sastre *et al.* Focused screening reveals functional effects of microRNAs differentially expressed in colorectal cancer.

- 531 17. Ritchie ME, Phipson B, Wu D, Hu Y, Law CW, Shi W, Smyth GK: limma powers  
532 differential expression analyses for RNA-sequencing and microarray studies.  
533 Nucleic Acids Res. 2015; 43:e47.
- 534 18. Lewis BP, Burge CB, Bartel DP: Conserved seed pairing, often flanked by  
535 adenosines, indicates that thousands of human genes are microRNA targets.  
536 Cell. 2005; 120:15-20.
- 537 19. Dennis G, Jr., Sherman BT, Hosack DA, Yang J, Gao W, Lane HC, Lempicki RA:  
538 DAVID: Database for Annotation, Visualization, and Integrated Discovery.  
539 Genome Biol. 2003; 4:P3.
- 540 20. Kanehisa M, Goto S: KEGG: kyoto encyclopedia of genes and genomes. Nucleic  
541 Acids Res. 2000; 28:27-30.
- 542 21. Chou CH, Shrestha S, Yang CD, Chang NW, Lin YL, Liao KW, Huang WC, Sun  
543 TH, Tu SJ, Lee WH *et al*: miRTarBase update 2018: a resource for  
544 experimentally validated microRNA-target interactions. Nucleic Acids Res. 2018;  
545 46:D296-D302.
- 546 22. Fussbroich B, Wagener N, Macher-Goeppinger S, Benner A, Falth M, Sultmann  
547 H, Holzer A, Hoppe-Seyler K, Hoppe-Seyler F: EZH2 depletion blocks the  
548 proliferation of colon cancer cells. PLoS One. 2011; 6:e21651.
- 549 23. Katona BW, Liu Y, Ma A, Jin J, Hua X: EZH2 inhibition enhances the efficacy of  
550 an EGFR inhibitor in suppressing colon cancer cells. Cancer Biol Ther. 2014;  
551 15:1677-87.
- 552 24. Kim JH, Sim SH, Ha HJ, Ko JJ, Lee K, Bae J: MCL-1ES, a novel variant of MCL-  
553 1, associates with MCL-1L and induces mitochondrial cell death. FEBS Lett.  
554 2009; 583:2758-64.
- 555 25. Esquela-Kerscher A, Slack FJ: Oncomirs - microRNAs with a role in cancer. Nat  
556 Rev Cancer. 2006; 6:259-69.
- 557 26. Calin GA, Sevignani C, Dumitru CD, Hyslop T, Noch E, Yendamuri S, Shimizu M,  
558 Rattan S, Bullrich F, Negrini M *et al*: Human microRNA genes are frequently  
559 located at fragile sites and genomic regions involved in cancers. Proc Natl Acad  
560 Sci U S A. 2004; 101:2999-3004.
- 561 27. Lagana A, Russo F, Sismeiro C, Giugno R, Pulvirenti A, Ferro A: Variability in the  
562 incidence of miRNAs and genes in fragile sites and the role of repeats and CpG  
563 islands in the distribution of genetic material. PLoS One. 2010; 5:e11166.
- 564 28. Lin SL, Chang DC, Chang-Lin S, Lin CH, Wu DT, Chen DT, Ying SY: Mir-302  
565 reprograms human skin cancer cells into a pluripotent ES-cell-like state. RNA.  
566 2008; 14:2115-24.
- 567 29. Zhu J, Chen L, Zou L, Yang P, Wu R, Mao Y, Zhou H, Li R, Wang K, Wang W *et*  
568 *al*: MiR-20b, -21, and -130b inhibit PTEN expression resulting in B7-H1 over-  
569 expression in advanced colorectal cancer. Hum Immunol. 2014; 75:348-53.
- 570 30. Li B, Song Y, Liu TJ, Cui YB, Jiang Y, Xie ZS, Xie SL: miRNA-22 suppresses  
571 colon cancer cell migration and invasion by inhibiting the expression of T-cell  
572 lymphoma invasion and metastasis 1 and matrix metalloproteinases 2 and 9.  
573 Oncol Rep. 2013; 29:1932-8.



Sastre *et al.* Focused screening reveals functional effects of microRNAs differentially expressed in colorectal cancer.

- 574 31. Fang Z, Tang J, Bai Y, Lin H, You H, Jin H, Lin L, You P, Li J, Dai Z *et al*: Plasma  
575 levels of microRNA-24, microRNA-320a, and microRNA-423-5p are potential  
576 biomarkers for colorectal carcinoma. *J Exp Clin Cancer Res.* 2015; 34:86.  
577 32. Strillacci A, Griffoni C, Sansone P, Paterini P, Piazzini G, Lazzarini G, Spisni E,  
578 Pantaleo MA, Biasco G, Tomasi V: MiR-101 downregulation is involved in  
579 cyclooxygenase-2 overexpression in human colon cancer cells. *Exp Cell Res.*  
580 2009; 315:1439-47.  
581 33. Ng EK, Chong WW, Jin H, Lam EK, Shin VY, Yu J, Poon TC, Ng SS, Sung JJ:  
582 Differential expression of microRNAs in plasma of patients with colorectal cancer:  
583 a potential marker for colorectal cancer screening. *Gut.* 2009; 58:1375-81.  
584 34. Lee Y, Jeon K, Lee JT, Kim S, Kim VN: MicroRNA maturation: stepwise  
585 processing and subcellular localization. *EMBO J.* 2002; 21:4663-70.  
586 35. Gao Z, Zhu X, Dou Y: The miR-302/367 cluster: a comprehensive update on its  
587 evolution and functions. *Open Biol.* 2015; 5:150138.  
588 36. Khuu C, Utheim TP, Sehic A: The Three Paralogous MicroRNA Clusters in  
589 Development and Disease, miR-17-92, miR-106a-363, and miR-106b-25.  
590 *Scientifica (Cairo).* 2016; 2016:1379643.  
591 37. Diosdado B, van de Wiel MA, Terhaar Sive Droste JS, Mongera S, Postma C,  
592 Meijerink WJ, Carvalho B, Meijer GA: MiR-17-92 cluster is associated with 13q  
593 gain and c-myc expression during colorectal adenoma to adenocarcinoma  
594 progression. *Br J Cancer.* 2009; 101:707-14.  
595 38. Anokye-Danso F, Trivedi CM, Juhr D, Gupta M, Cui Z, Tian Y, Zhang Y, Yang W,  
596 Gruber PJ, Epstein JA *et al*: Highly efficient miRNA-mediated reprogramming of  
597 mouse and human somatic cells to pluripotency. *Cell Stem Cell.* 2011; 8:376-88.  
598 39. Duong VH, Padron E, Al Ali NH, Lancet JE, Hall J, Kwok B, Zhang L, Epling-  
599 Burnette PK, List AF, Komrokji RS: The prognostic value of circulating  
600 myeloblasts in patients with myelodysplastic syndromes. *Ann Hematol.* 2018;  
601 97:247-54.  
602 40. Maadi H, Moshtaghian A, Taha MF, Mowla SJ, Kazeroonian A, Haass NK, Javeri  
603 A: Multimodal tumor suppression by miR-302 cluster in melanoma and colon  
604 cancer. *Int J Biochem Cell Biol.* 2016; 81:121-32.  
605 41. Chen LG, Xia YJ, Cui Y: Upregulation of miR-101 enhances the cytotoxic effect  
606 of anticancer drugs through inhibition of colon cancer cell proliferation. *Oncol*  
607 *Rep.* 2017; 38:100-8.  
608 42. Chen MB, Yang L, Lu PH, Fu XL, Zhang Y, Zhu YQ, Tian Y: MicroRNA-101  
609 down-regulates sphingosine kinase 1 in colorectal cancer cells. *Biochem Biophys*  
610 *Res Commun.* 2015; 463:954-60.  
611 43. Shen Q, Bae HJ, Eun JW, Kim HS, Park SJ, Shin WC, Lee EK, Park S, Park WS,  
612 Lee JY *et al*: MiR-101 functions as a tumor suppressor by directly targeting  
613 nemo-like kinase in liver cancer. *Cancer Lett.* 2014; 344:204-11.  
614 44. Yao YL, Ma J, Wang P, Xue YX, Li Z, Zhao LN, Li ZQ, Feng TD, Liu YH: miR-  
615 101 acts as a tumor suppressor by targeting Kruppel-like factor 6 in glioblastoma  
616 stem cells. *CNS Neurosci Ther.* 2015; 21:40-51.

Sastre *et al.* Focused screening reveals functional effects of microRNAs differentially expressed in colorectal cancer.

- 617 45. Wang R, Wang HB, Hao CJ, Cui Y, Han XC, Hu Y, Li FF, Xia HF, Ma X: MiR-101  
618 is involved in human breast carcinogenesis by targeting Stathmin1. *PLoS One.*  
619 2012; 7:e46173.
- 620 46. Konno Y, Dong P, Xiong Y, Suzuki F, Lu J, Cai M, Watari H, Mitamura T, Hosaka  
621 M, Hanley SJ *et al*: MicroRNA-101 targets EZH2, MCL-1 and FOS to suppress  
622 proliferation, invasion and stem cell-like phenotype of aggressive endometrial  
623 cancer cells. *Oncotarget.* 2014; 5:6049-62.
- 624 47. Strillacci A, Valerii MC, Sansone P, Caggiano C, Sgromo A, Vittori L, Fiorentino  
625 M, Poggioli G, Rizzello F, Campieri M *et al*: Loss of miR-101 expression  
626 promotes Wnt/beta-catenin signalling pathway activation and malignancy in colon  
627 cancer cells. *J Pathol.* 2013; 229:379-89.
- 628 48. Ma X, Bai J, Xie G, Liu Y, Shuai X, Tao K: Prognostic significance of microRNA-  
629 101 in solid tumor: A meta-analysis. *PLoS One.* 2017; 12:e0180173.
- 630 49. Hu J, Wu C, Zhao X, Liu C: The prognostic value of decreased miR-101 in  
631 various cancers: a meta-analysis of 12 studies. *Onco Targets Ther.* 2017;  
632 10:3709-18.
- 633 50. Li CY, Pang YY, Yang H, Li J, Lu HX, Wang HL, Mo WJ, Huang LS, Feng ZB,  
634 Chen G: Identification of miR-101-3p targets and functional features based on  
635 bioinformatics, meta-analysis and experimental verification in hepatocellular  
636 carcinoma. *Am J Transl Res.* 2017; 9:2088-105.
- 637 51. Slattery ML, Herrick JS, Pellatt DF, Mullany LE, Stevens JR, Wolff E, Hoffman  
638 MD, Wolff RK, Samowitz W: Site-specific associations between miRNA  
639 expression and survival in colorectal cancer cases. *Oncotarget.* 2016; 7:60193-  
640 205.
- 641 52. Chandramouli A, Onyeagucha BC, Mercado-Pimentel ME, Stankova L, Shahin  
642 NA, LaFleur BJ, Heimark RL, Bhattacharyya AK, Nelson MA: MicroRNA-101  
643 (miR-101) post-transcriptionally regulates the expression of EP4 receptor in  
644 colon cancers. *Cancer Biol Ther.* 2012; 13:175-83.
- 645 53. Hinoue T, Weisenberger DJ, Lange CP, Shen H, Byun HM, Van Den Berg D,  
646 Malik S, Pan F, Noushmehr H, van Dijk CM *et al*: Genome-scale analysis of  
647 aberrant DNA methylation in colorectal cancer. *Genome Res.* 2012; 22:271-82.
- 648 54. Piunti A, Rossi A, Cerutti A, Albert M, Jammula S, Scelfo A, Cedrone L, Fragola  
649 G, Olsson L, Koseki H *et al*: Polycomb proteins control proliferation and  
650 transformation independently of cell cycle checkpoints by regulating DNA  
651 replication. *Nat Commun.* 2014; 5:3649.
- 652 55. Peng Z, Zhang Y: Methyl jasmonate induces the apoptosis of human colorectal  
653 cancer cells via downregulation of EZH2 expression by microRNA101. *Mol Med*  
654 *Rep.* 2017; 15:957-62.
- 655 56. Tao J, Shi L, Huang L, Shi H, Chen H, Wang Y, Wang T: EZH2 is involved in  
656 silencing of WNT5A during epithelial-mesenchymal transition of colon cancer cell  
657 line. *J Cancer Res Clin Oncol.* 2017; 143:2211-9.
- 658 57. Yamamoto I, Nosho K, Kanno S, Igarashi H, Kurihara H, Ishigami K, Ishiguro K,  
659 Mitsuhashi K, Maruyama R, Koide H *et al*: EZH2 expression is a prognostic

Sastre *et al.* Focused screening reveals functional effects of microRNAs differentially

expressed in colorectal cancer.

- 660 biomarker in patients with colorectal cancer treated with anti-EGFR therapeutics.  
661 *Oncotarget*. 2017; 8:17810-8.
- 662 58. Guo Y, Wang M, Jia X, Zhu H, Zhi Y, Yuan L: Wnt signaling pathway upregulates  
663 DNMT1 to trigger NHERF1 promoter hypermethylation in colon cancer. *Oncol*  
664 *Rep*. 2018; 40:1165-73.
- 665 59. Lin RK, Hung WY, Huang YF, Chang YJ, Lin CH, Chen WY, Chiu SF, Chang SC,  
666 Tsai SF: Hypermethylation of BEND5 contributes to cell proliferation and is a  
667 prognostic marker of colorectal cancer. *Oncotarget*. 2017; 8:113431-43.
- 668 60. Islam F, Gopalan V, Pillai S, Lu CT, Kasem K, Lam AK: Promoter  
669 hypermethylation inactivate tumor suppressor FAM134B and is associated with  
670 poor prognosis in colorectal cancer. *Genes Chromosomes Cancer*. 2018;  
671 57:240-51.
- 672 61. Ashktorab H, Brim H: DNA Methylation and Colorectal Cancer. *Curr Colorectal*  
673 *Cancer Rep*. 2014; 10:425-30.
- 674 62. Yan F, Shen N, Pang J, Xie D, Deng B, Molina JR, Yang P, Liu S: Restoration of  
675 miR-101 suppresses lung tumorigenesis through inhibition of DNMT3a-  
676 dependent DNA methylation. *Cell Death Dis*. 2014; 5:e1413.
- 677 63. Toyota M, Suzuki H, Sasaki Y, Maruyama R, Imai K, Shinomura Y, Tokino T:  
678 Epigenetic silencing of microRNA-34b/c and B-cell translocation gene 4 is  
679 associated with CpG island methylation in colorectal cancer. *Cancer Res*. 2008;  
680 68:4123-32.
- 681 64. Kahlert UD, Suwala AK, Koch K, Natsumeda M, Orr BA, Hayashi M, Maciaczyk  
682 J, Eberhart CG: Pharmacologic Wnt Inhibition Reduces Proliferation, Survival,  
683 and Clonogenicity of Glioblastoma Cells. *J Neuropathol Exp Neurol*. 2015;  
684 74:889-900.
- 685 65. Mouradov D, Sloggett C, Jorissen RN, Love CG, Li S, Burgess AW, Arango D,  
686 Strausberg RL, Buchanan D, Wormald S *et al*: Colorectal cancer cell lines are  
687 representative models of the main molecular subtypes of primary cancer. *Cancer*  
688 *Res*. 2014; 74:3238-47.
- 689 66. Li SZ, Zeng F, Li J, Shu QP, Zhang HH, Xu J, Ren JW, Zhang XD, Song XM, Du  
690 RL: Nemo-like kinase (NLK) primes colorectal cancer progression by releasing  
691 the E2F1 complex from HDAC1. *Cancer Lett*. 2018; 431:43-53.
- 692 67. Wu RS, Qiu EH, Zhu JJ, Wang JR, Lin HL: MiR-101 promotes nasopharyngeal  
693 carcinoma cell apoptosis through inhibiting Ras/Raf/MEK/ERK signaling  
694 pathway. *Eur Rev Med Pharmacol Sci*. 2018; 22:150-7.
- 695 68. Nikoonahad Lotfabadi N, Mohseni Kouchesfahani H, Sheikha MH, Kalantar SM:  
696 In vitro transfection of anti-tumor miR-101 induces BIM, a pro-apoptotic protein,  
697 expression in acute myeloid leukemia (AML). *EXCLI J*. 2017; 16:1257-67.
- 698 69. Zhang S, Wang M, Li Q, Zhu P: MiR-101 reduces cell proliferation and invasion  
699 and enhances apoptosis in endometrial cancer via regulating PI3K/Akt/mTOR.  
700 *Cancer Biomark*. 2017; 21:179-86.
- 701 70. Beroukhi R, Mermel CH, Porter D, Wei G, Raychaudhuri S, Donovan J,  
702 Barretina J, Boehm JS, Dobson J, Urashima M *et al*: The landscape of somatic  
703 copy-number alteration across human cancers. *Nature*. 2010; 463:899-905.

Sastre *et al.* Focused screening reveals functional effects of microRNAs differentially expressed in colorectal cancer.

- 704 71. Thomas LW, Lam C, Edwards SW: Mcl-1; the molecular regulation of protein  
705 function. *FEBS Lett.* 2010; 584:2981-9.
- 706 72. Tong J, Wang P, Tan S, Chen D, Nikolovska-Coleska Z, Zou F, Yu J, Zhang L:  
707 Mcl-1 Degradation Is Required for Targeted Therapeutics to Eradicate Colon  
708 Cancer Cells. *Cancer Res.* 2017; 77:2512-21.
- 709 73. He H, Tian W, Chen H, Deng Y: MicroRNA-101 sensitizes hepatocellular  
710 carcinoma cells to doxorubicin-induced apoptosis via targeting Mcl-1. *Mol Med*  
711 *Rep.* 2016; 13:1923-9.
- 712 74. Ovens K, Naugler C: Preliminary evidence of different selection pressures on  
713 cancer cells as compared to normal tissues. *Theor Biol Med Model.* 2012; 9:44.
- 714 75. Luo H, Zou J, Dong Z, Zeng Q, Wu D, Liu L: Up-regulated miR-17 promotes cell  
715 proliferation, tumour growth and cell cycle progression by targeting the RND3  
716 tumour suppressor gene in colorectal carcinoma. *Biochem J.* 2012; 442:311-21.
- 717 76. Zekri AR, Youssef AS, Lotfy MM, Gabr R, Ahmed OS, Nassar A, Hussein N,  
718 Omran D, Medhat E, Eid S *et al*: Circulating Serum miRNAs as Diagnostic  
719 Markers for Colorectal Cancer. *PLoS One.* 2016; 11:e0154130.
- 720 77. Ng EK, Tsang WP, Ng SS, Jin HC, Yu J, Li JJ, Rocken C, Ebert MP, Kwok TT,  
721 Sung JJ: MicroRNA-143 targets DNA methyltransferases 3A in colorectal cancer.  
722 *Br J Cancer.* 2009; 101:699-706.
- 723 78. Zhang GJ, Zhou T, Liu ZL, Tian HP, Xia SS: Plasma miR-200c and miR-18a as  
724 potential biomarkers for the detection of colorectal carcinoma. *Mol Clin Oncol.*  
725 2013; 1:379-84.
- 726 79. Brunet Vega A, Pericay C, Moya I, Ferrer A, Dotor E, Pisa A, Casalots A, Serra-  
727 Aracil X, Oliva JC, Ruiz A *et al*: microRNA expression profile in stage III  
728 colorectal cancer: circulating miR-18a and miR-29a as promising biomarkers.  
729 *Oncol Rep.* 2013; 30:320-6.
- 730 80. Arndt GM, Dossey L, Cullen LM, Lai A, Druker R, Eisbacher M, Zhang C, Tran N,  
731 Fan H, Retzlaff K *et al*: Characterization of global microRNA expression reveals  
732 oncogenic potential of miR-145 in metastatic colorectal cancer. *BMC Cancer.*  
733 2009; 9:374.
- 734 81. Li Y, Chen M, Liu J, Li L, Yang X, Zhao J, Wu M, Ye M: Upregulation of  
735 MicroRNA 18b Contributes to the Development of Colorectal Cancer by Inhibiting  
736 CDKN2B. *Mol Cell Biol.* 2017; 37.
- 737 82. Wang YX, Zhang XY, Zhang BF, Yang CQ, Chen XM, Gao HJ: Initial study of  
738 microRNA expression profiles of colonic cancer without lymph node metastasis. *J*  
739 *Dig Dis.* 2010; 11:50-4.
- 740 83. Zhu M, Huang Z, Zhu D, Zhou X, Shan X, Qi LW, Wu L, Cheng W, Zhu J, Zhang  
741 L *et al*: A panel of microRNA signature in serum for colorectal cancer diagnosis.  
742 *Oncotarget.* 2017; 8:17081-91.
- 743 84. Sarver AL, French AJ, Borralho PM, Thayanithy V, Oberg AL, Silverstein KA,  
744 Morlan BW, Riska SM, Boardman LA, Cunningham JM *et al*: Human colon  
745 cancer profiles show differential microRNA expression depending on mismatch  
746 repair status and are characteristic of undifferentiated proliferative states. *BMC*  
747 *Cancer.* 2009; 9:401.

Sastre *et al.* Focused screening reveals functional effects of microRNAs differentially expressed in colorectal cancer.

- 748 85. Schee K, Lorenz S, Worren MM, Gunther CC, Holden M, Hovig E, Fodstad O,  
749 Meza-Zepeda LA, Flatmark K: Deep Sequencing the MicroRNA Transcriptome in  
750 Colorectal Cancer. *PLoS One*. 2013; 8:e66165.
- 751 86. Liu Y, Chen X, Cheng R, Yang F, Yu M, Wang C, Cui S, Hong Y, Liang H, Liu M  
752 *et al*: The Jun/miR-22/HuR regulatory axis contributes to tumourigenesis in  
753 colorectal cancer. *Mol Cancer*. 2018; 17:11.
- 754 87. Zhang G, Xia S, Tian H, Liu Z, Zhou T: Clinical significance of miR-22 expression  
755 in patients with colorectal cancer. *Med Oncol*. 2012; 29:3108-12.
- 756 88. Deng YH, Deng ZH, Hao H, Wu XL, Gao H, Tang SH, Tang H: MicroRNA-23a  
757 promotes colorectal cancer cell survival by targeting PDK4. *Exp Cell Res*. 2018;  
758 373:171-9.
- 759 89. Ogata-Kawata H, Izumiya M, Kurioka D, Honma Y, Yamada Y, Furuta K, Gunji T,  
760 Ohta H, Okamoto H, Sonoda H *et al*: Circulating exosomal microRNAs as  
761 biomarkers of colon cancer. *PLoS One*. 2014; 9:e92921.
- 762 90. Liang J, Tang J, Shi H, Li H, Zhen T, Duan J, Kang L, Zhang F, Dong Y, Han A:  
763 miR-27a-3p targeting RXRalpha promotes colorectal cancer progression by  
764 activating Wnt/beta-catenin pathway. *Oncotarget*. 2017; 8:82991-3008.
- 765 91. Bao Y, Chen Z, Guo Y, Feng Y, Li Z, Han W, Wang J, Zhao W, Jiao Y, Li K *et al*:  
766 Tumor suppressor microRNA-27a in colorectal carcinogenesis and progression  
767 by targeting SGPP1 and Smad2. *PLoS One*. 2014; 9:e105991.
- 768 92. Wang B, Li W, Liu H, Yang L, Liao Q, Cui S, Wang H, Zhao L: miR-29b  
769 suppresses tumor growth and metastasis in colorectal cancer via downregulating  
770 Tiam1 expression and inhibiting epithelial-mesenchymal transition. *Cell Death*  
771 *Dis*. 2014; 5:e1335.
- 772 93. Schepeler T, Reinert JT, Ostenfeld MS, Christensen LL, Silaharoglu AN,  
773 Dyrskjot L, Wiuf C, Sorensen FJ, Kruhoffer M, Laurberg S *et al*: Diagnostic and  
774 prognostic microRNAs in stage II colon cancer. *Cancer Res*. 2008; 68:6416-24.
- 775 94. He D, Yue Z, Li G, Chen L, Feng H, Sun J: Low Serum Levels of miR-101 Are  
776 Associated with Poor Prognosis of Colorectal Cancer Patients After Curative  
777 Resection. *Med Sci Monit*. 2018; 24:7475-81.
- 778 95. Chai J, Wang S, Han D, Dong W, Xie C, Guo H: MicroRNA-455 inhibits  
779 proliferation and invasion of colorectal cancer by targeting RAF proto-oncogene  
780 serine/threonine-protein kinase. *Tumour Biol*. 2015; 36:1313-21.
- 781 96. Michael MZ, SM OC, van Holst Pellekaan NG, Young GP, James RJ: Reduced  
782 accumulation of specific microRNAs in colorectal neoplasia. *Mol Cancer Res*.  
783 2003; 1:882-91.
- 784 97. Ozcan O, Kara M, Yumrutas O, Bozgeyik E, Bozgeyik I, Celik OI: MTUS1 and its  
785 targeting miRNAs in colorectal carcinoma: significant associations. *Tumour Biol*.  
786 2016; 37:6637-45.
- 787 98. Wei ZJ, Tao ML, Zhang W, Han GD, Zhu ZC, Miao ZG, Li JY, Qiao ZB: Up-  
788 regulation of microRNA-302a inhibited the proliferation and invasion of colorectal  
789 cancer cells by regulation of the MAPK and PI3K/Akt signaling pathways. *Int J*  
790 *Clin Exp Pathol*. 2015; 8:4481-91.



Sastre *et al.* Focused screening reveals functional effects of microRNAs differentially expressed in colorectal cancer.

- 791 99. Zhang Y, Li M, Ding Y, Fan Z, Zhang J, Zhang H, Jiang B, Zhu Y: Serum  
 792 MicroRNA profile in patients with colon adenomas or cancer. *BMC Med*  
 793 *Genomics*. 2017; 10:23.  
 794 100. Dong J, Geng J, Tan W: MiR-363-3p suppresses tumor growth and metastasis of  
 795 colorectal cancer via targeting SphK2. *Biomed Pharmacother*. 2018; 105:922-31.  
 796 101. Eyking A, Reis H, Frank M, Gerken G, Schmid KW, Cario E: MiR-205 and MiR-  
 797 373 Are Associated with Aggressive Human Mucinous Colorectal Cancer. *PLoS*  
 798 *One*. 2016; 11:e0156871.  
 799  
 800

801

802

803 **Table 1: miRNAs differentially expressed in CRC and their function in embryonic**  
 804 **stem cells (ESC).**

| microRNA       | Expression in CRC | Tissue             | Reference | Function in ESC [16] |
|----------------|-------------------|--------------------|-----------|----------------------|
| hsa-miR-17-3p  | Up                | Tumor tissue       | [75]      | Pluripotency         |
|                | Up                | Serum              | [76]      |                      |
|                | Up                | Tumor tissue       | [77]      |                      |
|                | Up                | Tumor tissue       | [29]      |                      |
| hsa-miR-18a-5p | Up                | Plasma             | [78]      | Pluripotency         |
|                | Up                | Fixed tumor tissue | [79]      |                      |
|                | Up                | Tumor tissue       | [77]      |                      |
|                | Up                | Tumor tissue       | [29]      |                      |
|                | Up                | Tumor tissue       | [80]      |                      |
| hsa-miR-18b-5p | Up                | Tumor tissue       | [81]      | Pluripotency         |
|                | Up                | Tumor tissue       | [82]      |                      |
| hsa-miR-19a-3p | Up                | Serum              | [83]      | Pluripotency         |
|                | Up                | Serum              | [76]      |                      |
|                | Up                | Tumor tissue       | [82]      |                      |
|                | Up                | Tumor tissue       | [80]      |                      |
| hsa-miR-19b-3p | Up                | Tumor tissue       | [80]      | Pluripotency         |
|                | Up                | Serum              | [76]      |                      |
| hsa-miR-20a-5p | Up                | Tumor tissue       | [77]      | Pluripotency         |
|                | Up                | Serum              | [76]      |                      |

Sastre *et al.* Focused screening reveals functional effects of microRNAs differentially expressed in colorectal cancer.

|                 |      |                    |      |                 |
|-----------------|------|--------------------|------|-----------------|
|                 | Up   | Fixed tumor tissue | [79] |                 |
|                 | Up   | Tumor tissue       | [80] |                 |
| hsa-miR-20b-5p  | Down | Tumor tissue       | [84] | Pluripotency    |
|                 | Up   | Tumor tissue       | [29] |                 |
| hsa-miR-21-5p   | Up   | Serum              | [83] | Differentiation |
|                 | Up   | Tumor tissue       | [29] |                 |
|                 | Up   | Fixed tumor tissue | [79] |                 |
|                 | Up   | Tumor tissue       | [80] |                 |
|                 | Up   | Tumor tissue       | [85] |                 |
| hsa-miR-22-3p   | Down | Tumor tissue       | [86] | Differentiation |
|                 | Down | Tumor tissue       | [87] |                 |
|                 | Up   | Tumor tissue       | [85] |                 |
| hsa-miR-23a-3p  | Up   | Tumor tissue       | [88] | Differentiation |
|                 | Up   | Tumor tissue       | [89] |                 |
| hsa-miR-24-3p   | Up   | Serum              | [76] | Differentiation |
|                 | Down | Plasma             | [31] |                 |
| hsa-miR-27a-3p  | Up   | Tumor tissue       | [90] | Differentiation |
|                 | Down | Tumor tissue       | [91] |                 |
| hsa-miR-29a-3p  | Up   | Tumor tissue       | [80] | Differentiation |
|                 | Up   | Fixed tumor tissue | [79] |                 |
| hsa-miR-29b     | Down | Tumor tissue       | [92] |                 |
|                 | Up   | Tumor tissue       | [80] | Pluripotency    |
| hsa-miR-30a-5p  | Down | Tumor tissue       | [80] | Differentiation |
|                 | Down | Tumor tissue       | [84] |                 |
| hsa-miR-92a-3p  | Up   | Tumor tissue       | [77] |                 |
|                 | Up   | Plasma             | [77] | Pluripotency    |
|                 | Up   | Tumor tissue       | [29] |                 |
|                 | Up   | Fixed tumor tissue | [79] |                 |
| hsa-miR-101-3p  | Down | Tumor tissue       | [93] | Pluripotency    |
|                 | Down | Serum              | [94] |                 |
|                 | Down | Tumor tissue       | [95] |                 |
| hsa-miR-106a-5p | Up   | Tumor tissue       | [77] | Pluripotency    |
|                 | Up   | Tumor tissue       | [29] |                 |
|                 | Up   | Tumor tissue       | [80] |                 |
| hsa-miR-145-5p  | Down | Tumor tissue       | [96] | Differentiation |
|                 | Down | Tumor tissue       | [29] |                 |
|                 | Down | Tumor tissue       | [80] |                 |
| hsa-miR-181d-5p | Up   | Tumor tissue       | [89] | Differentiation |

Sastre *et al.* Focused screening reveals functional effects of microRNAs differentially expressed in colorectal cancer.

|                 |         |                    |       |                 |
|-----------------|---------|--------------------|-------|-----------------|
|                 | Up      | Fixed tumor tissue | [97]  |                 |
| hsa-miR-222-3p  | Up      | Tumor tissue       | [77]  | Differentiation |
|                 | Up      | Plasma             | [77]  |                 |
| hsa-miR-302a-3p | Down    | CRC cell lines     | [98]  | Pluripotency    |
| hsa-miR-302a-5p | Unknown | -                  | -     | Pluripotency    |
| hsa-miR-302b-3p | Unknown | -                  | -     | Pluripotency    |
| hsa-miR-302b-5p | Unknown | -                  | -     | Pluripotency    |
| hsa-miR-302c-3p | Down    | Plasma             | [99]  | Pluripotency    |
| hsa-miR-302d-3p | Unknown | -                  | -     | Pluripotency    |
| hsa-miR-363-3p  | Down    | Tumor tissue       | [100] | Pluripotency    |
| hsa-miR-371a-3p | Unknown | -                  | -     | Pluripotency    |
| hsa-miR-372-3p  | Up      | Fixed tumor tissue | [97]  | Pluripotency    |
| hsa-miR-373-3p  | Up      | Fixed tumor tissue | [97]  | Pluripotency    |
|                 | Up      | Fixed tumor tissue | [101] |                 |

805 CRC, colorectal cancer; ESC, embryonic stem cells.

806 **Table 2: KEGG signaling pathways modulated by predicted miR-101-3p targets**

808 **downregulated experimentally in HCT116 cells.**

| Pathway and Genes                                                                                   | Target Count | %   | P-Value | Benjamini |
|-----------------------------------------------------------------------------------------------------|--------------|-----|---------|-----------|
| Wnt signaling pathway<br><i>CXXC4, CAMK2G, FZD4, FZD6, NLK, PLCB1, RAC1</i>                         | 7            | 3,6 | 2,1E-3  | 2,7E-1    |
| Melanogenesis<br><i>GNAI3, ADCY6, CAMK2G, FZD4, FZD6, PLCB1</i>                                     | 6            | 3,1 | 2,7E-3  | 1,8E-1    |
| Pathways in cancer<br><i>CEBPA, GNAI3, ADCY6, FZD4, FZD6, ITGA3, PAX8, PLCB1, RAC1, RXRB, TCEB1</i> | 11           | 5,7 | 4,3E-3  | 1,9E-1    |
| Sphingolipid signaling pathway<br><i>GNAI3, CERS2, CERS6, PLCB1, RAC1, SGPL1</i>                    | 6            | 3,1 | 6,0E-3  | 2,0E-1    |
| Ubiquitin mediated proteolysis<br><i>MGRN1, TCEB1, UBE2A, UBE2D1, UBE2D3, UBE2Q1</i>                | 6            | 3,1 | 1,0E-2  | 2,6E-1    |
| Phosphatidylinositol signaling system                                                               | 5            | 2,6 | 1,5E-2  | 3,1E-1    |



Sastre *et al.* Focused screening reveals functional effects of microRNAs differentially

expressed in colorectal cancer.

*CDS2, MTMR2, PIP5K1C, PLCB1, TMEM55A*

Transcriptional misregulation in cancer 6 3,1 2,3E-2 3,9E-1  
*CEBPA, DOT1L, PAX8, RXRB, SLC45A3, MYCN*

Gastric acid secretion 4 2,1 3,3E-2 4,7E-1  
*GNAI3, ADCY6, CAMK2G, PLCB1*

cAMP signaling pathway 6 3,1 4,2E-2 5,1E-1  
*GNAI3, SOX9, ADCY6, CAMK2G, PDE4A, RAC1*

Proteoglycans in cancer 6 3,1 4,4E-2 4,9E-1  
*GAB1, CAMK2G, CAV3, FZD4, FZD6, RAC1*

Insulin secretion 4 2,1 4,9E-2 4,9E-1  
*ADCY6, CAMK2G, PLCB1, KCNN3*

Gap junction 4 2,1 5,3E-2 4,9E-1  
*GNAI3, ADCY6, GJA1, PLCB1*

Circadian entrainment 4 2,1 6,4E-2 5,3E-1  
*GNAI3, ADCY6, CAMK2G, PLCB1*

Inflammatory mediator regulation of TRP channels 4 2,1 6,9E-2 5,3E-1  
*ASIC1, ADCY6, CAMK2G, PLCB1*

Sphingolipid metabolism 3 1,6 7,6E-2 5,4E-1  
*CERS2, CERS6, SGPL1*

Cholinergic synapse 4 2,1 9,2E-2 5,9E-1  
*GNAI3, ADCY6, CAMK2G, PLCB1*

# 1 Focused screening reveals functional effects of microRNAs differentially 2 expressed in colorectal cancer

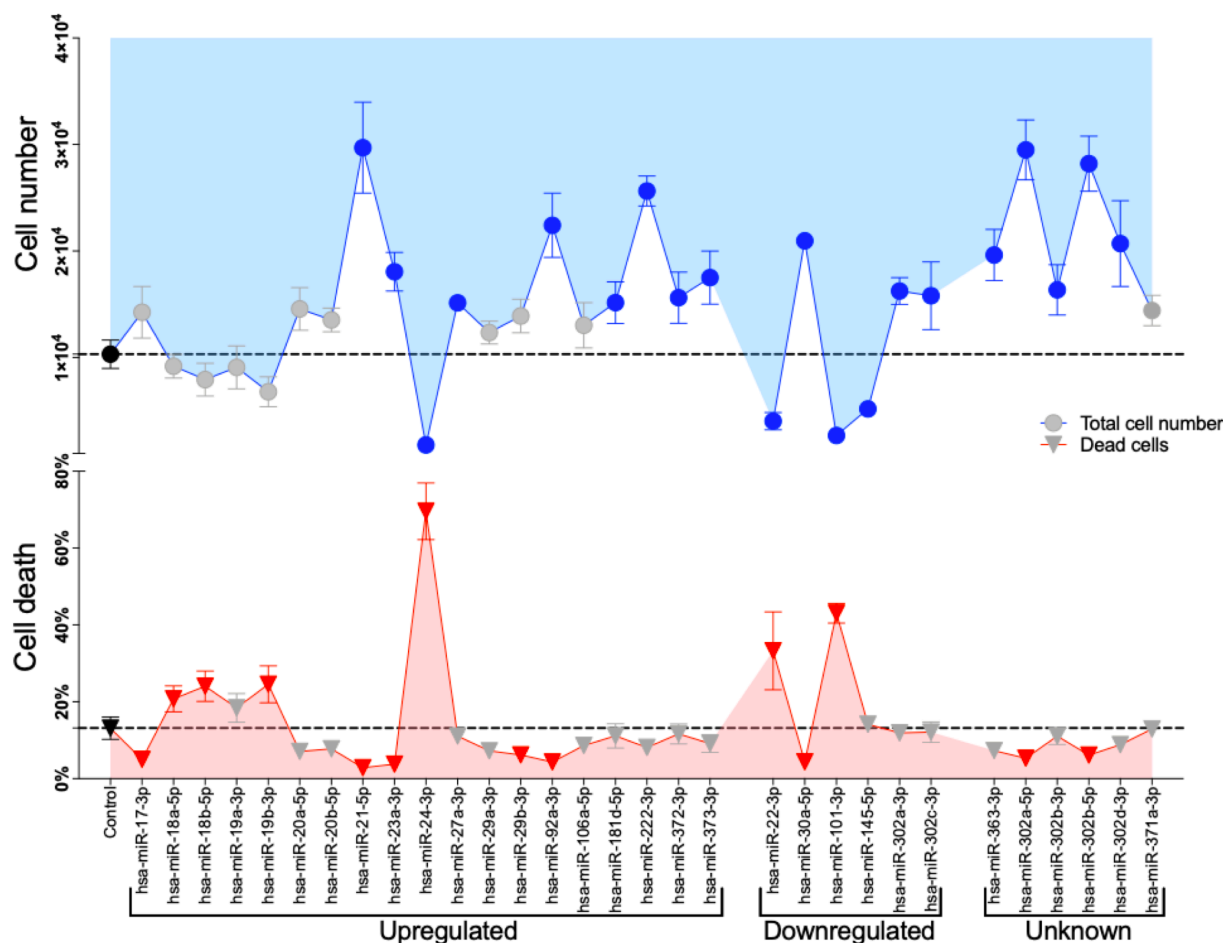

3  
4  
5  
6  
7 **Figure 1: miRNAs differentially expressed in CRC modulate the proliferation of**  
8 **HCT116 cells.**

9 HCT116 were treated with 50nM of miRNA mimics for 4 days in 96-well plates. Total  
10 number of cells and number of dead cells were quantified by high-content screening  
11 analysis. Data is expressed as mean  $\pm$  SD. Gray symbols indicate no significant  
12 differences.

13

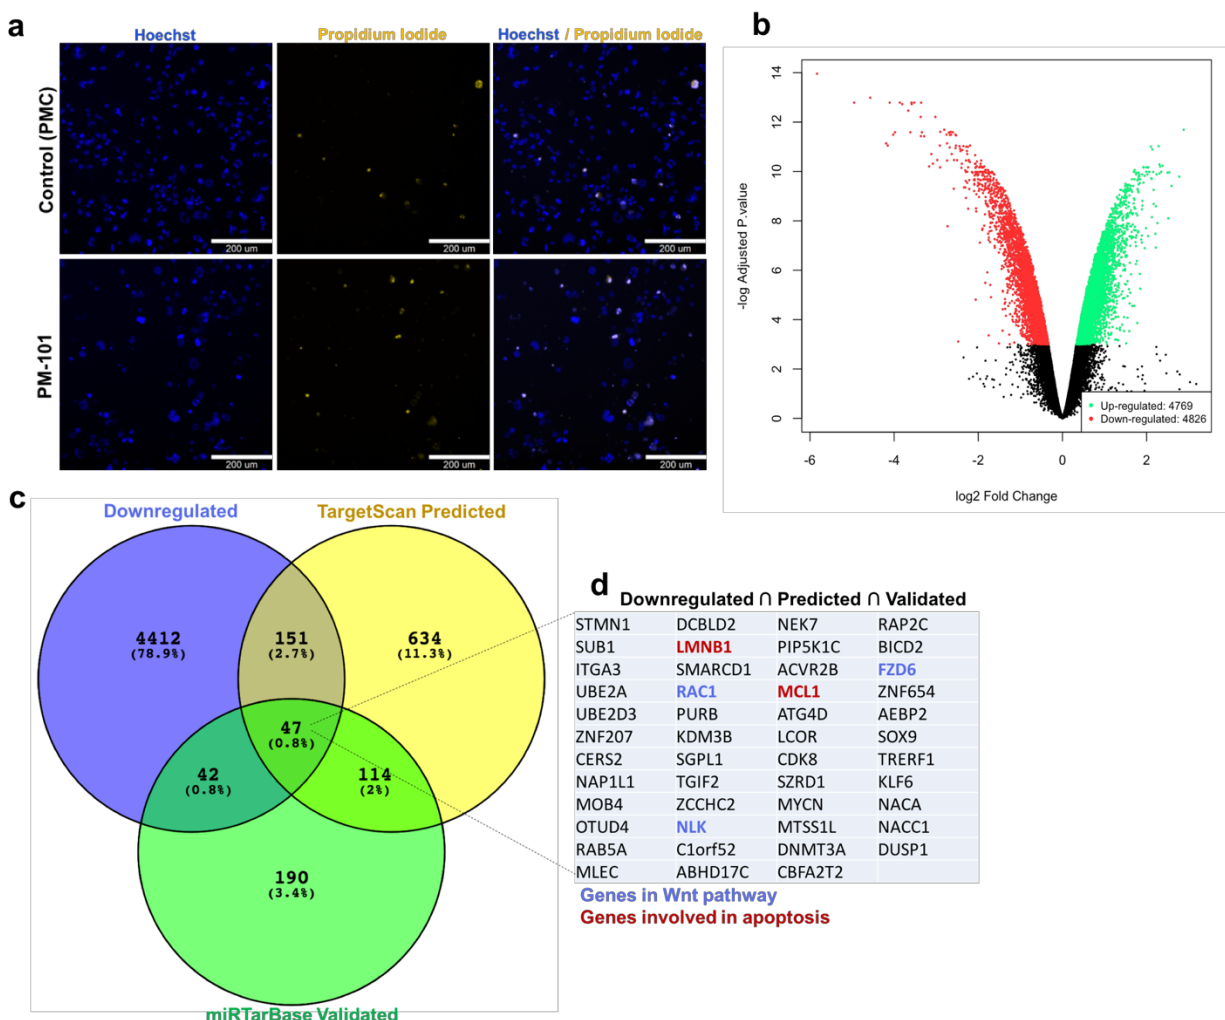

14

15 **Figure 2: Differential gene expression in HCT116 treated with miR-101-3p.**

16 a) Representative fields of HCT116 treated with miR-101-3p for 4 days, showing

17 increase in cell death and decrease of overall proliferation; b) Volcano plot showing

18 downregulated (red) and upregulated (green) transcripts as a function of fold-change

19 and P-value after 3 days of treatment; c) Experimentally downregulated targets are

20 crossed with predicted and validated targets to identify high confidence targets; d)

21 Functionally validated targets (miRTarBase) that were downregulated by miR-101-3p in

22 microarray analysis.

23

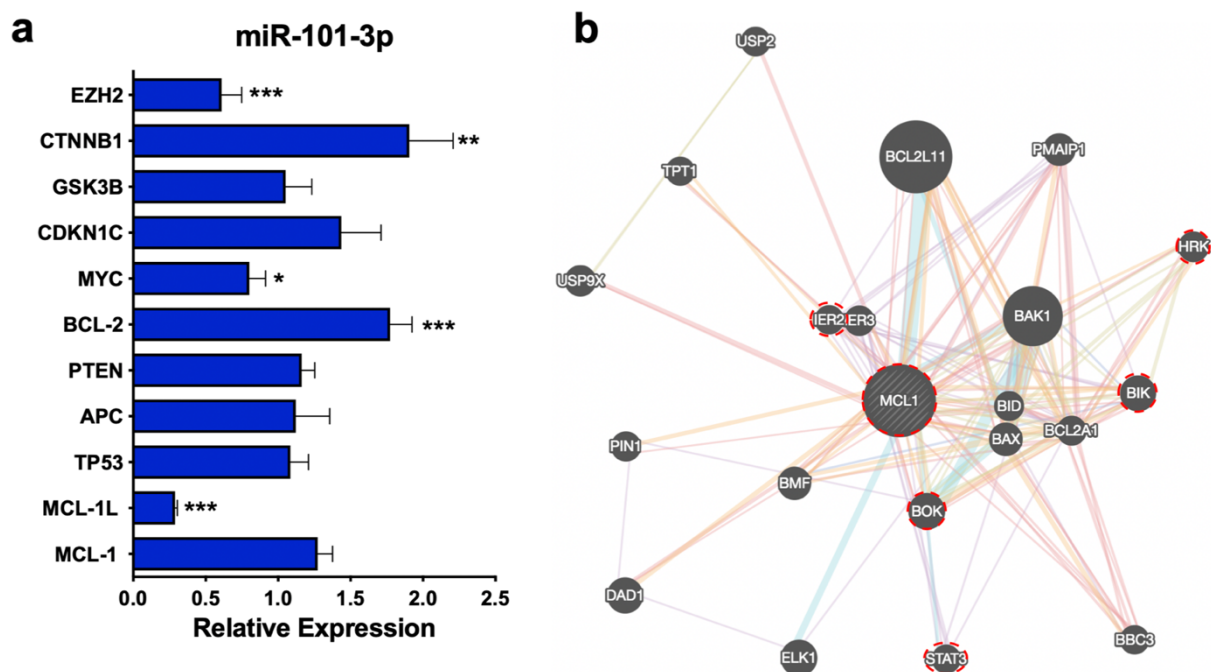

24

25 **Figure 3: Genes downregulated by miR-101-3p in HCT116.**

26 a) Expression of potential direct and indirect targets of miR-101-3p in HCT116 cells  
27 relative to control; b) MCL-1 protein interaction network. Red circles indicate genes  
28 downregulated by miR-101-3p in microarray data. Data is expressed as mean  $\pm$  SD.

29 N=3. \*  $p < 0.01$ , \*\*  $p < 0.001$ , \*\*\*  $p < 0.0001$

30

31

32
